# Supplementary material
Source: ML conference proceedings conference paper supplement (https://openaccess.thecvf.com/content/CVPR2021/html/Lal_CoCoNets_Continuous_Contrastive_CVPR_2021_paper.html)
Supplement: Supplementary file 2 [file Lal_CoCoNets_Continuous_Contrastive_CVPR_2021_supplemental.zip]

Archive with 7 entries (6 files):
- 10375-supp/
- 10375-supp/.DS_Store
- __MACOSX/10375-supp/._.DS_Store
- 10375-supp/CVPR suppli.mp4
- __MACOSX/10375-supp/._CVPR suppli.mp4
- 10375-supp/10375-supp.pdf
- __MACOSX/10375-supp/._10375-supp.pdf
